# Supplementary material for: Altered Phenylpropanoid Metabolism in the Maize Lc-Expressed Sweet Potato (Ipomoea batatas) Affects Storage Root Development
Source: PubMed Central journal article supplement (PMC4698713; doi:10.1038/srep18645), 2016-01-04
Supplement: srep18645-s1.pdf [file srep18645-s1.pdf]

**Altered Phenylpropanoid Metabolism in the Maize *Lc*-Expressed Sweet Potato (*Ipomoea batatas*) Affects Storage Root Development.** Hongxia Wang, JunYang, Min Zhang, Weijuan Fan, Nurit Firon, Sitakanta Pattanaik, Ling Yuan and Peng Zhang

**SUPPLEMENTARY INFORMATION**

**Supplementary Table S1** | qRT-PCR primers for the genes related to the flavonoid, lignin and starch metabolism pathways

| <b>Primer</b>       | <b>Forward primer (5'→3')</b> | <b>Reverse primer (5'→3')</b> |
|---------------------|-------------------------------|-------------------------------|
| <i>qlbPAL</i>       | GCGGAGCACGAGAAGAATGT          | ATGGCAGGGTTCCGTTCTC           |
| <i>qlbCHI</i>       | GCCGAAGTCAAAGTGGAGAG          | CGCCTATCGCCGTGAACTTG          |
| <i>qlbCHS</i>       | CGCACTTGGATAGCCTGGTC          | ATCGGGAGCCAAGGTCTGCG          |
| <i>qlbF3H</i>       | CATCGTTTCCAGCCATCTCC          | TTTCCGTTACTGCCCTCCAC          |
| <i>qlbFLS</i>       | CCTCCTTCTGCGGTGAACTA          | CCTGCAGCTTCCTTCAACTC          |
| <i>qlbDFR</i>       | TTTATCGGCTCCTGGTTGGT          | CGTGTCGGCTTTCCGGTAGTT         |
| <i>qlbANS</i>       | GCGTCCCTAACTCCATCATC          | AGAACACCGCCCAAGAAACC          |
| <i>qlbGT</i>        | CGCCCTAAAAGCCCCATT            | CTCACAAAGCAGCCCACAGAT         |
| <i>qlbC4H</i>       | TGGTGATTTTCATCCCCATTT         | TTTTGCTGGGCTTCAAGAAT          |
| <i>qlb4CL</i>       | TATTTTCCGATCGAGGTTGC          | ACTTTCCGGCAAATCAAATG          |
| <i>qlbCCR</i>       | GCAGAGATAACGGCCAGAAG          | TTGCTACAACCCACCATCAA          |
| <i>qlbCAD</i>       | AGCTGGTAATGGTTGGCATC          | TCCAAAGCCGTGTTGACATA          |
| <i>qlbCOMT</i>      | AAACGGGAAAGTGATCGTTG          | CCATGATCCAAGTGTTGACG          |
| <i>qlbCCoAOMT</i>   | CCGTTCTTGACCAGATGAT           | TTCCACAGGGTGTTGTCGTA          |
| <i>qlbAGPa</i>      | TCGACGGTGATGTTAGCAAG          | AACAGCCTTTGGAGAAACGA          |
| <i>qlbAGPb</i>      | GACAAGAACGTAAGGATTGGGA        | CGAATGGTTGCTTTCTCCAT          |
| <i>qlbGBSSI</i>     | CAGTTGGTTTGCCAGTTGAC          | ACGTTGAACTTTGCCACTCC          |
| <i>qlbSBEI</i>      | GGTTTACGGGTCTTGATGGA          | AACAGCCTGCTATCCCACAC          |
| <i>qlbSBEII</i>     | CTTCCCTGAAGCCATAACCA          | CCATTTGCCAATCCTCATCT          |
| <i>qlbSS</i>        | CGGTTCACTTTGCTTTGTCA          | CATTGTGTGGGCGATACTTG          |
| <i>qlba-amlyase</i> | CTGCATTTTTGTTCCCTGCAA         | TTCGATGCGTCCAAGTCATA          |
| <i>qlbB-amlyase</i> | AGACTGGAAGGAGGCTGTGA          | TGTTGGCTTCTTCGAGGACT          |
| <i>lbactin</i>      | CTGGTGTTATGGTTGGGATGG         | GGGGTGCCTCGGTAAGAAG           |

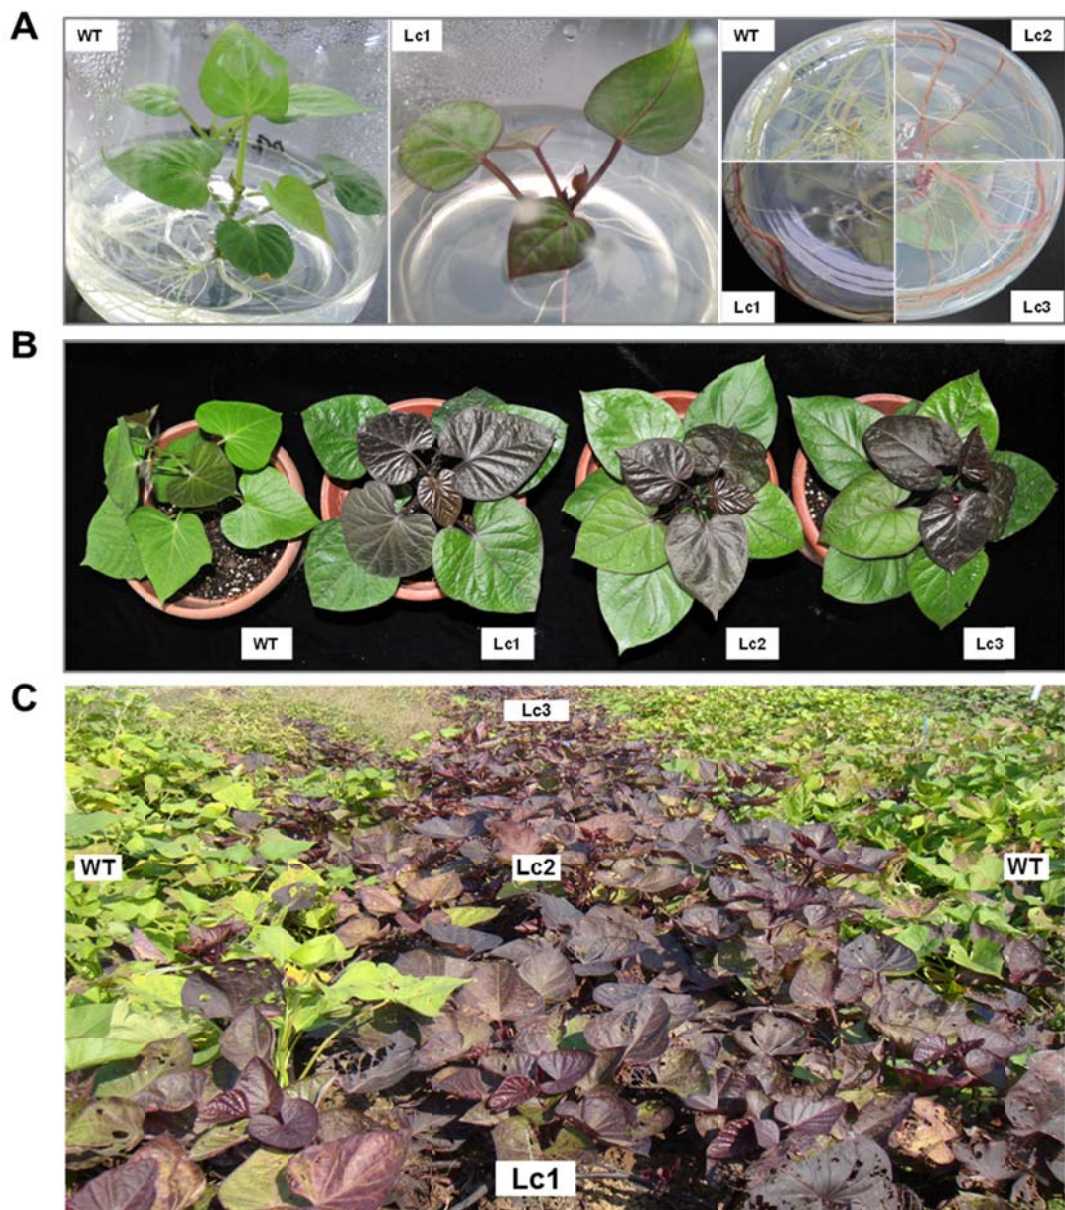

**Supplementary Figure S1** | Enhanced pigmentation in Lc transgenic plants. (A) *In vitro* shoot culture. (B) Plantlets in the pots. (C) Plants in field before harvest.

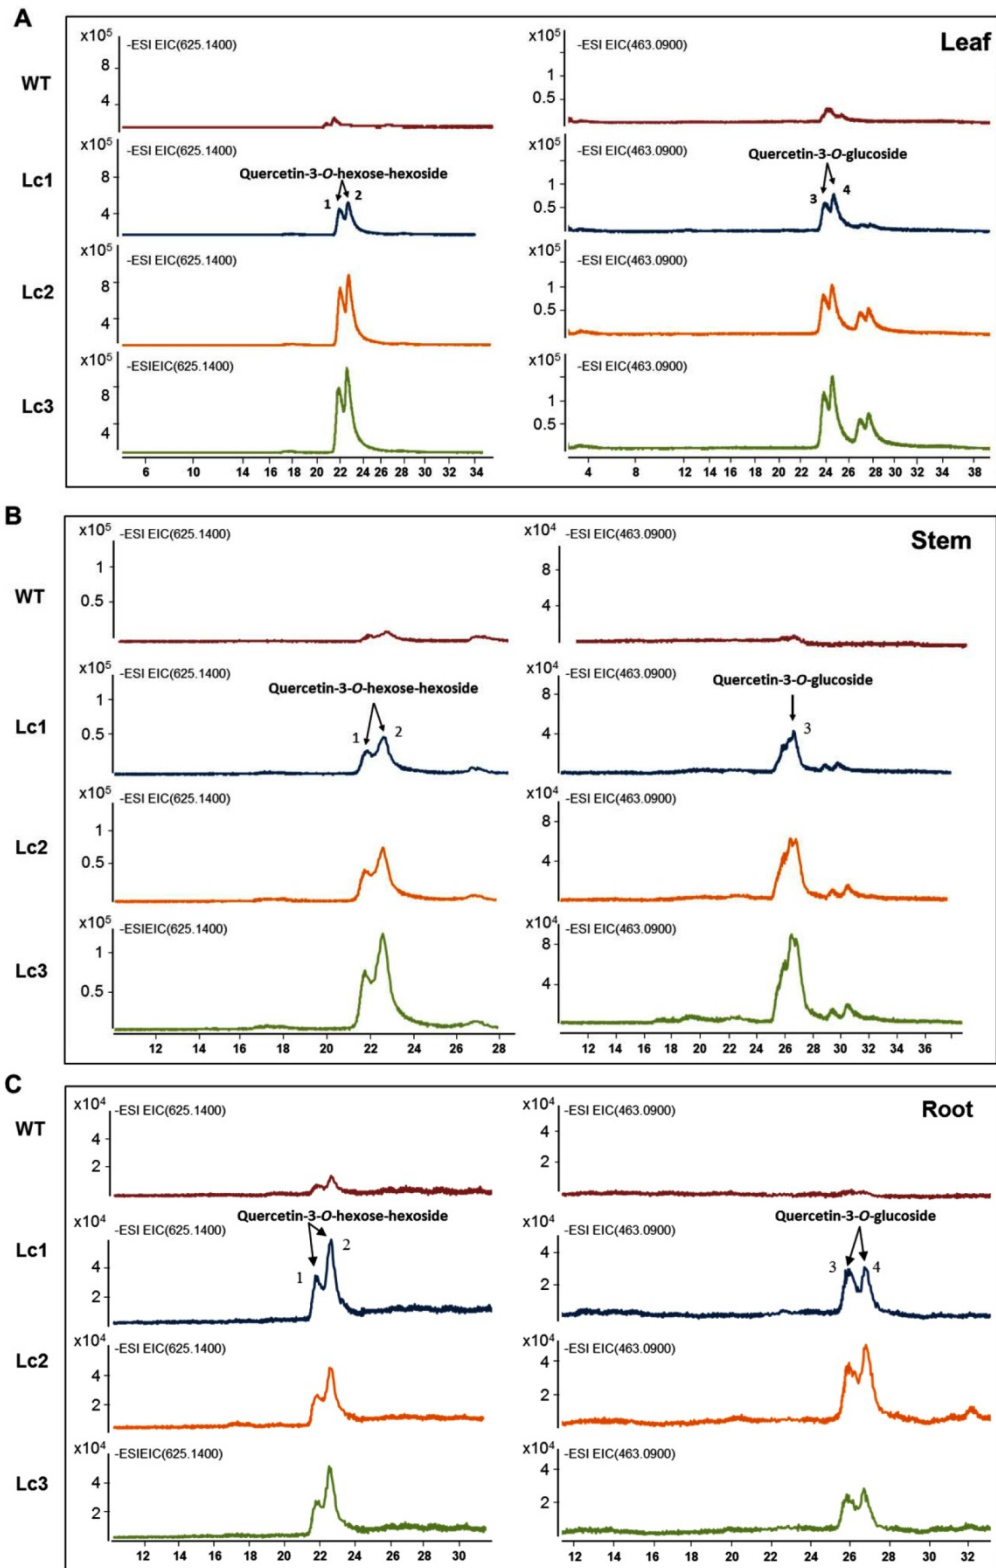

**Supplementary Figure S2** | HPLC-MS analyses of flavonols in wild-type and *Lc* transgenic sweet potato. Leaf (A), stem (B) and developing storage root (C) were measured. Quercetin-3-O-hexose-hexoside (molecular weight, 625.14) and quercetin-3-o-glucoside (molecular weight, 463.09) are indicated by arrows.

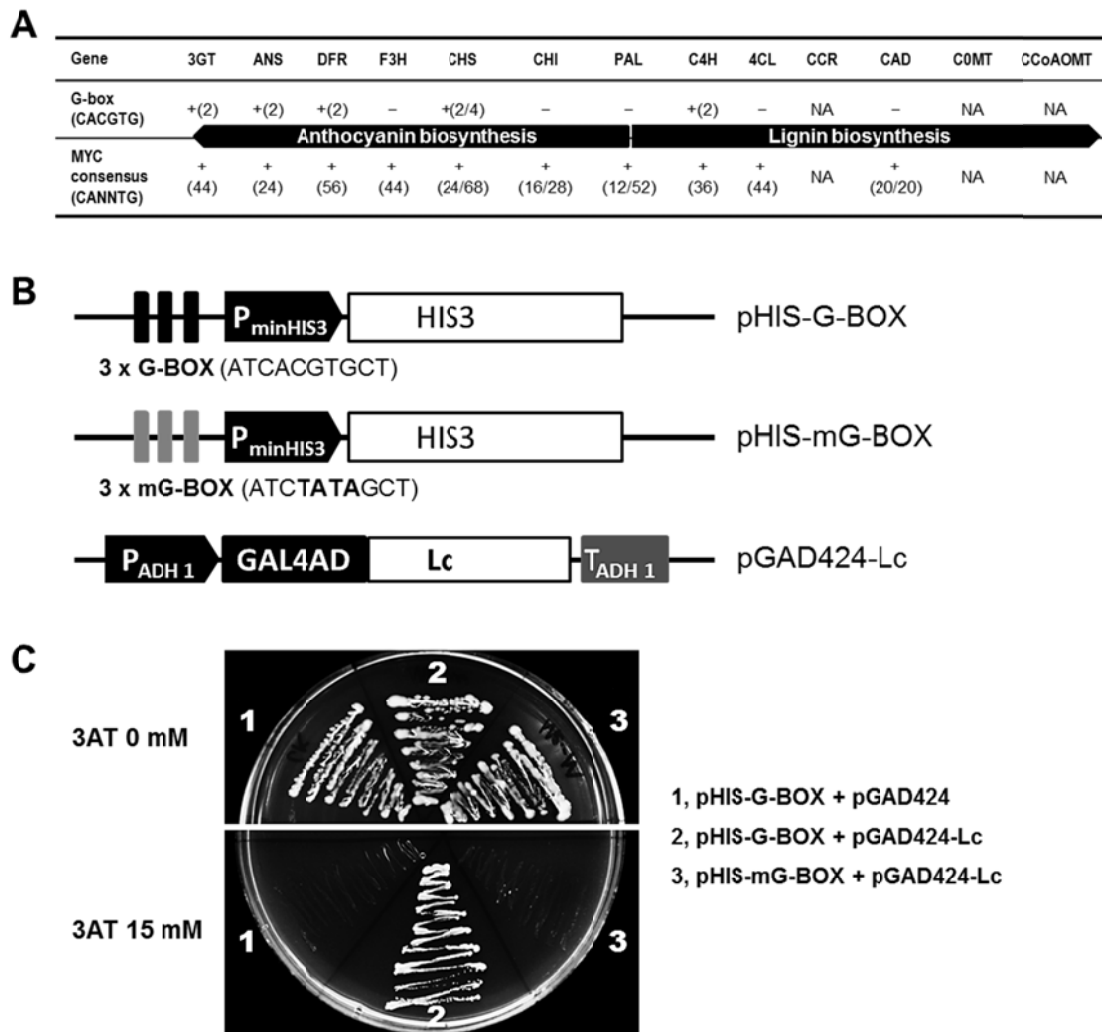

**Supplementary Figure S3** | The Lc-binding element G-box and MYC consensus in the promoter regions of sweet potato anthocyanin and lignin biosynthetic genes and G-box binding activity by the yeast one hybrid assay. (A) Promoters containing G-box (5'-CACGTG-3') and MYC consensus (CANNTG) are indicated by "+"; their numbers are indicated within parenthesis and different available homologous gene separated by "/". NA, not available. (B) The bait vector pHIS-G-box and pHIS-mG-box harbor three copies of the regular G-box and mutant (5'-ATCTATAGCT-3') sequences, respectively; the prey vector pGAD424-G-BOX-Lc contains the *Lc* sequence. pGAD424 was used as the negative control. (C) The growth status of the transformed yeast report strain with prey and bait vectors. Only the strain transformed with pHIS-G-box and pGAD424-G-BOX-Lc showed resistance on the SD/-His-Leu plate supplemented with 30 mM 3-amino-1,2,4-triazole (3-AT).

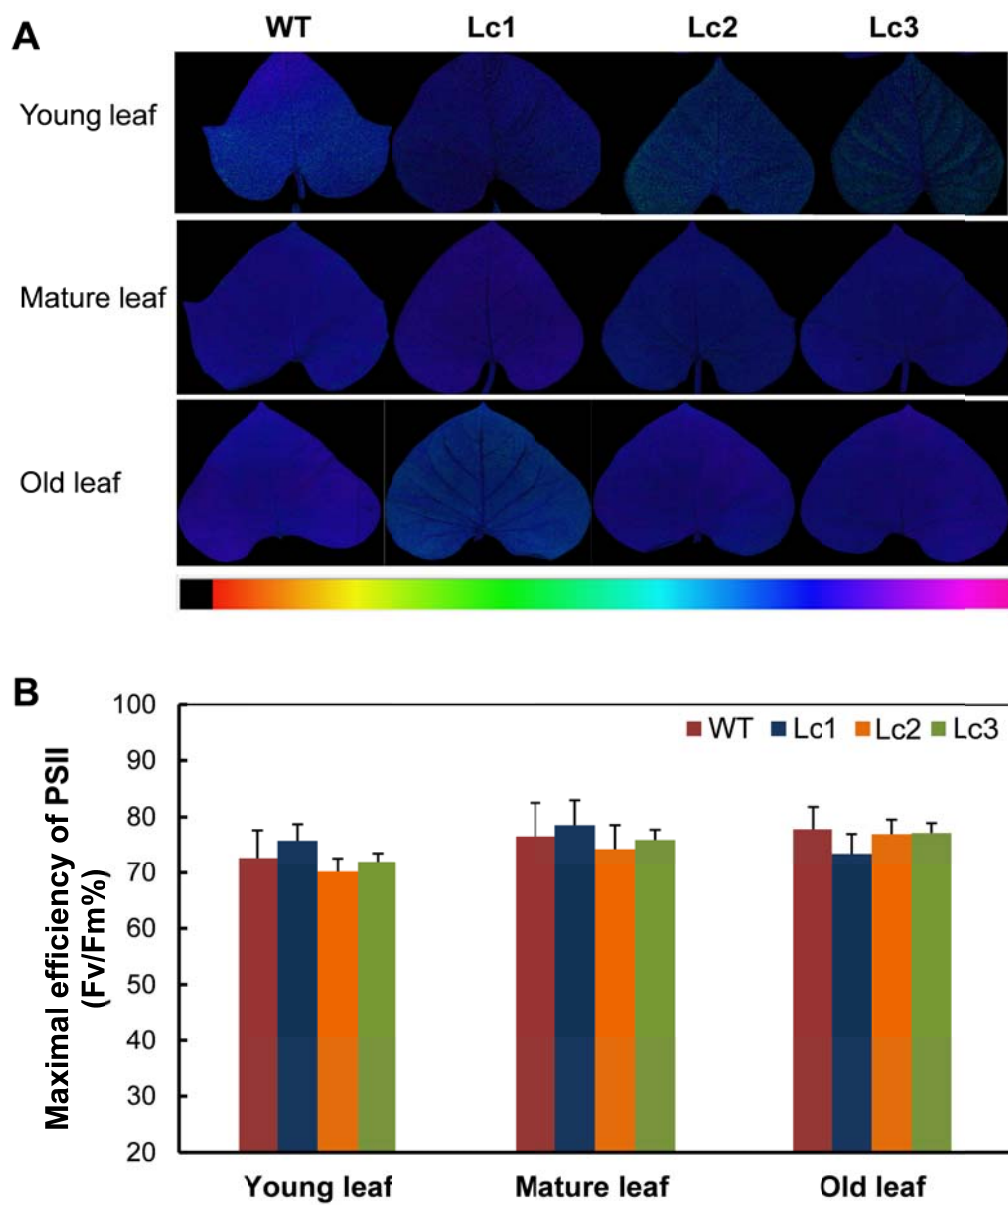

**Supplementary Figure S4** | Photosynthesis capacity of young, mature and old leaves in wild-type and *Lc* transgenic sweet potato. (A) Chlorophyll fluorescence. (B) Maximal quantum yield of PSII (Fv/Fm). Error bars represent the SE of three replicates.

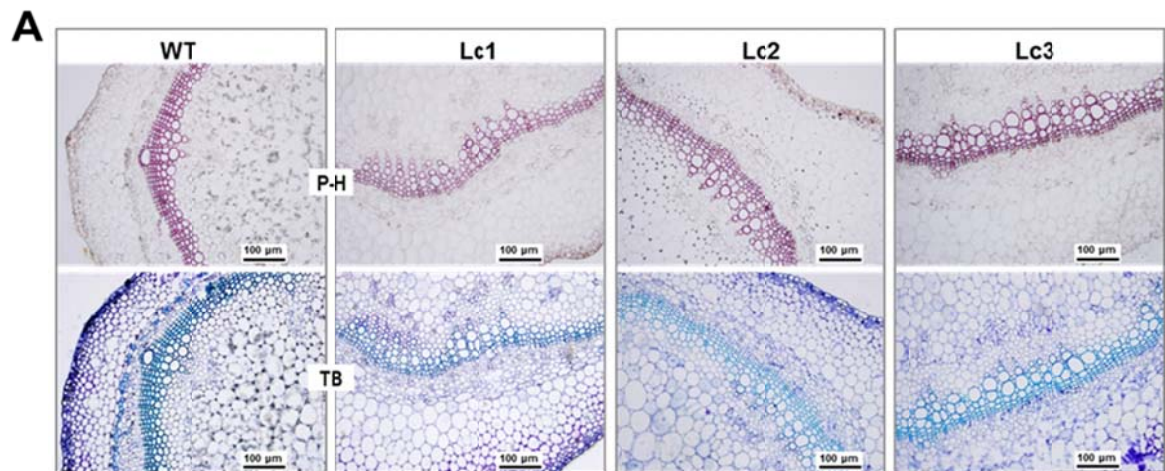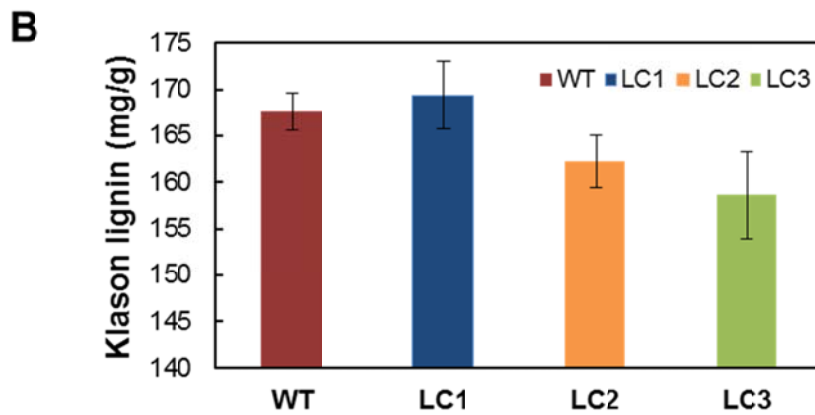

**Supplementary Figure S5** | Lignin deposition patterns (A) and Klason lignin content (B) in wild-type and *Lc* transgenic sweet potato. Stem sections of 1.5-month-old plants were stained with two dyes, phloroglucinol-HCl (P-H) and toluidine blue (TB). WT, wild type; Lc1–3, independent *Lc* transgenic lines. Error bars represent the SE of three independent replicates.

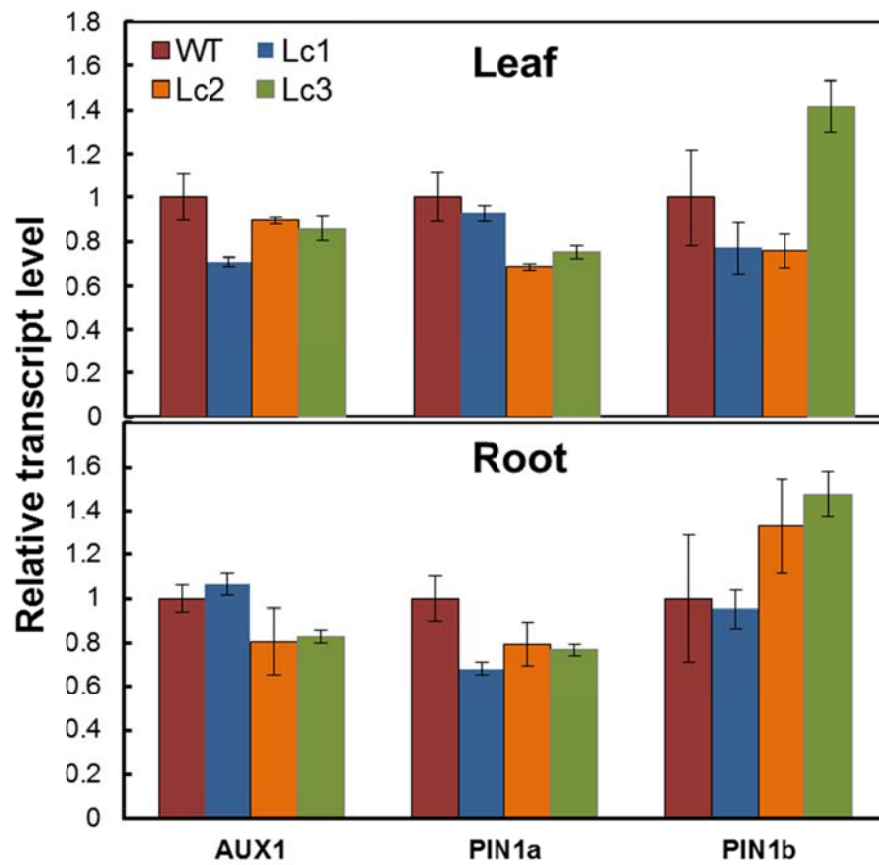

**Supplementary Figure S6** | qRT-PCR analysis of the changes in the transcript levels of genes related to auxin transport in leaves and developing storage roots (S16) of 2-month-old wild-type (WT) and *Lc* transgenic sweet potato. Lc1–3, independent *Lc* transgenic lines. AUX1, auxin transporter protein 1; PIN1a, PIN-FORMED1a; PIN1b, PIN-FORMED1b. Error bars represent the SE of three independent replicates.
